# Supplementary material for: Preparation of a Solvent-Resistant Nanofiltration Membrane of Liquefied Walnut Shell Modified by Ethylenediamine
Source: MDPI journal article supplement (doi:10.3390/membranes13080719), 2023-08-04
Supplement: s1 [file s1]

**Table S1.** The C, N and O compositions and O/N values of the C-PEI, NF-C, NF-1NP, NF-2LWP and NF-E-2LWP membranes.

| Membrane  | Element content (atom. %) |       |       |      |       |
|-----------|---------------------------|-------|-------|------|-------|
|           | C                         | N     | O     | S    | O/N   |
| C-PEI     | 76.00                     | 8.45  | 14.75 | 0.20 | 0.194 |
| NF-C      | 63.2                      | 21.95 | 13.9  | 0.94 | 0.633 |
| NF-2LWP   | 75.97                     | 10.75 | 12.85 | 0.43 | 1.195 |
| NF-E-1LWP | 63.89                     | 21.70 | 14.05 | 0.36 | 0.647 |
| NF-E-2LWP | 64.96                     | 20.56 | 14.25 | 0.23 | 0.69  |
